# Supplementary material for: Fgf8 genetic labeling reveals the early specification of vestibular hair cell type in mouse utricle
Source: Oxford University Press journal article supplement (doi:10.1242/dev.192849), 2020-01-01
Supplement: dev192849supp.pdf [file dev192849supp.pdf]

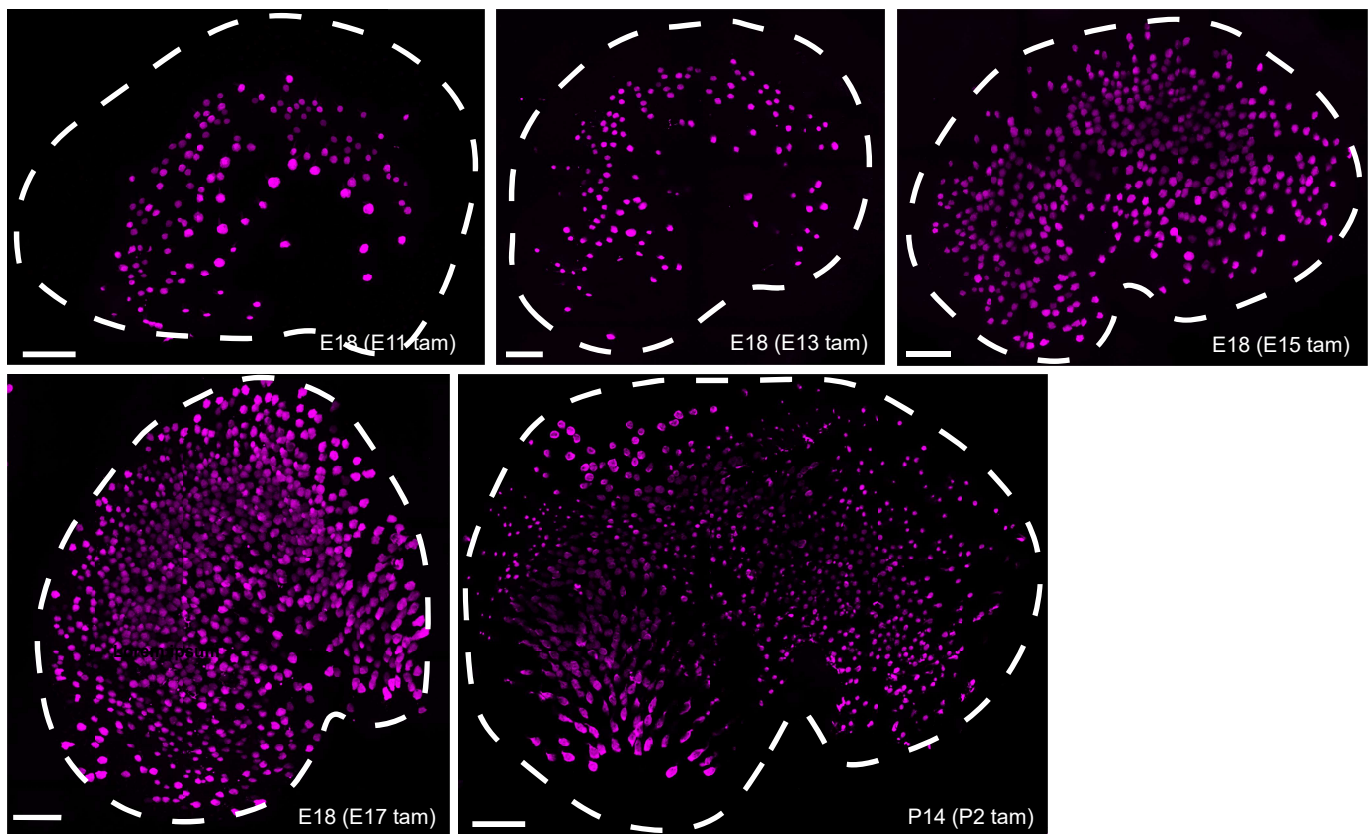

**Figure S1. Timecourse of  $Fgf8^{mcm}$  genetic labeling in the developing mouse utricle.** tdTomato labeling of utricular hair cells following a single dose of tamoxifen delivered at (A) E11.5, (B) E13.5, (C) E15.5 or (D) E17.5 and evaluated at E18.5. (E) tdTomato labeling of utricular hair cells following a single dose of tamoxifen delivered at P2 and evaluated at P14. Panels (A) and (D) are reprinted from primary figures. Scale bars: (50  $\mu$ m)

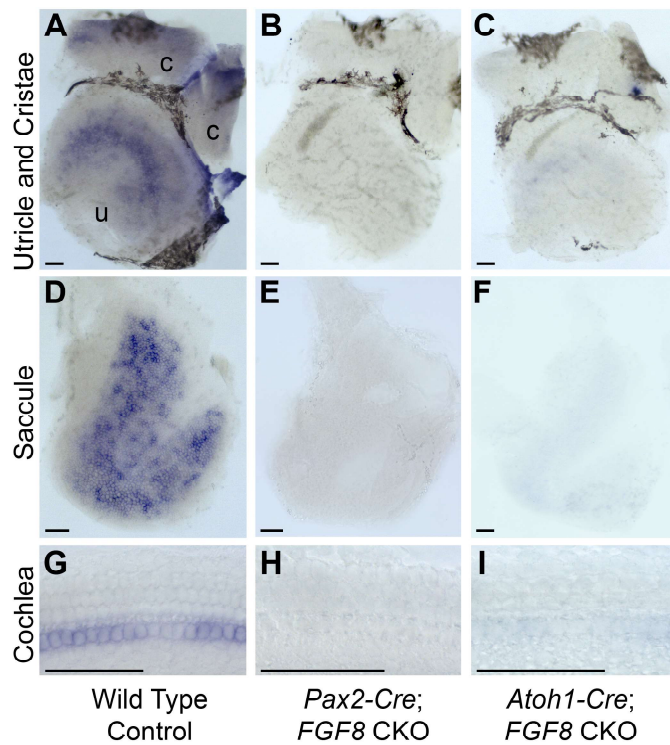

**Figure S2. *Fgf8* expression is abolished in *Pax2-Cre* and *Atoh1-Cre*; *Fgf8* CKOs**  
 (A) Wholemout ISH for *Fgf8* shows vestibular hair cell expression in littermate control utricle (u) and cristae (c), saccule (D), and inner hair cells (G) of the organ of Corti. (B,E,H) *Fgf8* mRNA is completely lost following gene deletion using *Pax2-Cre* in each of these sensory epithelia. (C,F) *Fgf8* mRNA is lost from the extrastricular regions of the utricle and saccule and the inner hair cells (I) of the organ of Corti following hair cell specific deletion using *Atoh1-Cre*. Brackets indicate the approximate boundaries of the striolar region. Scale bars: (50 $\mu$ m)

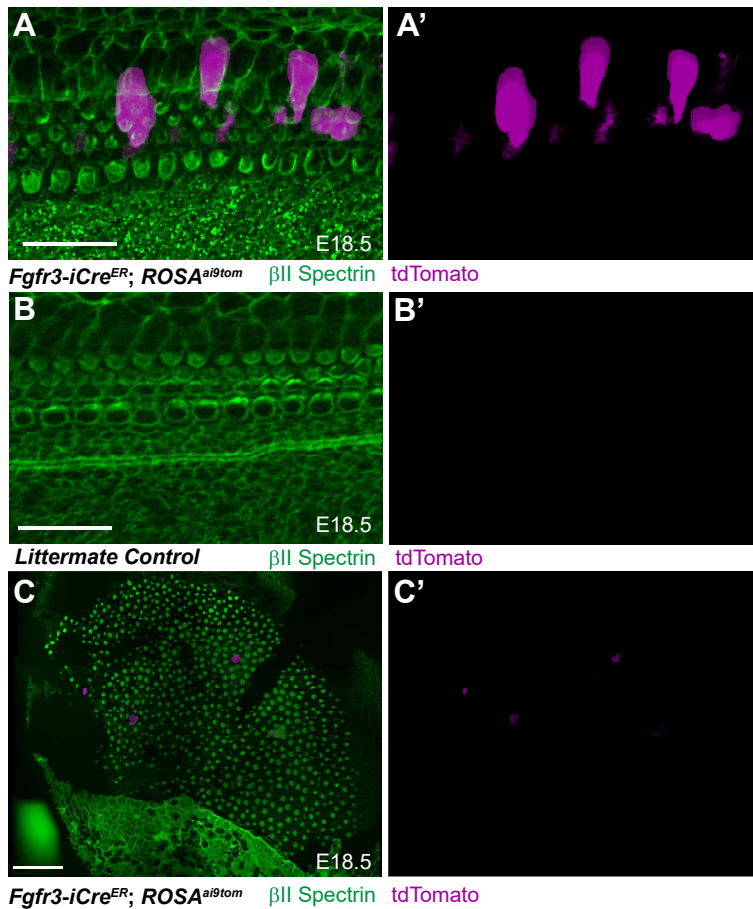

**Figure S3. Fgfr3 expression is absent from the majority of the utricle**

**(A)** Fgfr3-iCreER tdTomato labeling of cells in the organ of Corti following daily tamoxifen injections from E9.5 to E12.5. **(B)** Cre negative littermate control cochlea showing activation of the tdTomato reporter. **(C)** Fgfr3-iCreER shows minimal labeling of the utricle following the same tamoxifen regimen.  $\beta$ II-spectrin labeling shows the distribution of vestibular hair cells. Scale bars: 20 $\mu$ m (A,B); 50 $\mu$ m (C).

P14 (E11.5 Tam) from Fig. 6D

| Utricle | tdTomato (+) | tdTomato(+) w/ Calyx | % Colocalized | Mean     | 83% |
|---------|--------------|----------------------|---------------|----------|-----|
| 1       | 12           | 9                    | 75%           | STDEV    | 12% |
| 2       | 12           | 11                   | 92%           | STDERROR | 8%  |
|         |              |                      |               | √N       | 1.4 |

P14 (E17.5 Tam) from Fig. 6D

| Utricle | tdTomato (+) | tdTomato(+) w/ Calyx | % Colocalized | Mean     | 92% |
|---------|--------------|----------------------|---------------|----------|-----|
| 1       | 360          | 354                  | 98%           | STDEV    | 6%  |
| 2       | 300          | 277                  | 92%           | STDERROR | 3%  |
| 3       | 466          | 403                  | 86%           | √N       | 1.7 |

P14 (P2 Tam) from Fig. 6D

| Utricle | tdTomato (+) | tdTomato(+) w/ Calyx | % Colocalized | Mean     | 90% |
|---------|--------------|----------------------|---------------|----------|-----|
| 1       | 34           | 33                   | 97%           | STDEV    | 7%  |
| 2       | 445          | 374                  | 84%           | STDERROR | 4%  |
| 3       | 464          | 419                  | 90%           | √N       | 1.7 |

**Table S1. Raw data used for quantification graphs presented in Figure 6**

P14 (P2 Tam) from Fig. 7D

| Utricle | tdTomato (+) | tdTomato (+) w/ OPN | % Colocalized | Mean     | 86% |
|---------|--------------|---------------------|---------------|----------|-----|
| 1       | 205          | 188                 | 92%           | STDEV    | 9%  |
| 2       | 206          | 187                 | 91%           | STDERROR | 5%  |
| 3       | 45           | 34                  | 76%           | √N       | 1.7 |

P14 (P2 Tam) from Fig. 7D

| Utricle | tdTomato (+) | tdTomato (+) w/ Calb2 | % Colocalized | Mean     | 6%  |
|---------|--------------|-----------------------|---------------|----------|-----|
| 1       | 28           | 1                     | 4%            | STDEV    | 5%  |
| 2       | 390          | 46                    | 12%           | STDERROR | 3%  |
| 3       | 396          | 12                    | 3%            | √N       | 1.7 |

P14 (P2 Tam) from Fig. 7D

| Utricle | tdTomato (+) | tdTomato (+) w/ Anxa4 | % Colocalized | Mean     | 4%  |
|---------|--------------|-----------------------|---------------|----------|-----|
| 1       | 149          | 9                     | 6%            | STDEV    | 2%  |
| 2       | 321          | 10                    | 3%            | STDERROR | 1%  |
| 3       | 275          | 10                    | 4%            | √N       | 1.7 |

**Table S2. Raw data used for quantification graphs presented in Figure 7**

P14 from Fig. 8I

| Utricle | Genotype           | MyoVIIa | BIII Tubulin+MyoVIIa | % HCs with Calyx | Mean     | 61% |
|---------|--------------------|---------|----------------------|------------------|----------|-----|
| 1       | Littermate Control | 778     | 511                  | 66%              | STDEV    | 4%  |
| 2       | Littermate Control | 845     | 486                  | 58%              | STDERROR | 2%  |
| 3       | Littermate Control | 945     | 566                  | 60%              | √N       | 1.7 |

  

| Utricle | Genotype                  | MyoVIIa | BIII Tubulin+MyoVIIa | % HCs with Calyx | Mean     | 61% |
|---------|---------------------------|---------|----------------------|------------------|----------|-----|
| 1       | <i>Atoh1-Cre;Fgf8</i> CKO | 955     | 525                  | 55%              | STDEV    | 5%  |
| 2       | <i>Atoh1-Cre;Fgf8</i> CKO | 914     | 575                  | 63%              | STDERROR | 3%  |
| 3       | <i>Atoh1-Cre;Fgf8</i> CKO | 913     | 590                  | 65%              | √N       | 1.7 |

P14 from Fig. 8J

| Utricle | Genotype           | OPN | Mean     | 121  |
|---------|--------------------|-----|----------|------|
| 1       | Littermate Control | 138 | STDEV    | 20   |
| 2       | Littermate Control | 99  | STDERROR | 12   |
| 3       | Littermate Control | 127 | √N       | 1.73 |

| Utricle | Genotype                  | OPN | Mean     | 93   |
|---------|---------------------------|-----|----------|------|
| 1       | <i>Pax2-Cre; Fgf8</i> CKO | 149 | STDEV    | 51   |
| 2       | <i>Pax2-Cre; Fgf8</i> CKO | 50  | STDERROR | 29   |
| 3       | <i>Pax2-Cre; Fgf8</i> CKO | 79  | √N       | 1.73 |

P14 from Fig. 8J

| Utricle | Genotype           | OCM | Mean     | 123  |
|---------|--------------------|-----|----------|------|
| 1       | Littermate Control | 134 | STDEV    | 17   |
| 2       | Littermate Control | 104 | STDERROR | 8    |
| 3       | Littermate Control | 140 | √N       | 2.00 |
| 4       | Littermate Control | 114 |          |      |

| Utricle | Genotype                  | OCM | Mean     | 122  |
|---------|---------------------------|-----|----------|------|
| 1       | <i>Pax2-Cre; Fgf8</i> CKO | 128 | STDEV    | 10   |
| 2       | <i>Pax2-Cre; Fgf8</i> CKO | 110 | STDERROR | 6    |
| 3       | <i>Pax2-Cre; Fgf8</i> CKO | 128 | √N       | 1.73 |

P14 from Fig. 8J

| Utricle | Genotype           | Mean LWSR | Mean     | 0.56 |
|---------|--------------------|-----------|----------|------|
| 1       | Littermate Control | 0.51      | STDEV    | 0.04 |
| 2       | Littermate Control | 0.57      | STDERROR | 0.02 |
| 3       | Littermate Control | 0.56      | √N       | 2.45 |
| 4       | Littermate Control | 0.55      |          |      |
| 5       | Littermate Control | 0.55      |          |      |
| 6       | Littermate Control | 0.56      |          |      |
| 7       | Littermate Control | 0.55      |          |      |
| 8       | Littermate Control | 0.66      |          |      |

| Utricle | Genotype                  | Mean LWSR | Mean     | 0.54 |
|---------|---------------------------|-----------|----------|------|
| 1       | <i>Pax2-Cre; Fgf8</i> CKO | 0.56      | STDEV    | 0.08 |
| 2       | <i>Pax2-Cre; Fgf8</i> CKO | 0.45      | STDERROR | 0.03 |
| 3       | <i>Pax2-Cre; Fgf8</i> CKO | 0.51      | √N       | 2.45 |
| 4       | <i>Pax2-Cre; Fgf8</i> CKO | 0.70      |          |      |
| 5       | <i>Pax2-Cre; Fgf8</i> CKO | 0.56      |          |      |
| 6       | <i>Pax2-Cre; Fgf8</i> CKO | 0.49      |          |      |
| 7       | <i>Pax2-Cre; Fgf8</i> CKO | 0.47      |          |      |

**Table S3. Raw data used for quantification graphs presented in Figure 8**

Comparison of E18.5 *Pax2-Cre; Fgf8* CKO utricles to littermate controls for presence of Type I hair cells in the striola Oncomodulin and extrastriola with Osteopontin from Fig. 8J and Lateral extrastriolar width to striolar width ratio (LWSR) compared between E18.5 *Pax2-Cre; Fgf8* CKO utricles corresponding to Fig. 8J.
